# Supplementary material
Source: PubMed Central journal article supplement (PMC8568632)

## Supplementary Figures

**Figure S1.** Top panel, UMAP projection of LAM lung tissue scRNA-seq data (6). Bottom panels, zoom-in image of the LAM and lung mesenchymal cell cluster, and expression of defined LAM cell markers (6).

Figure S1

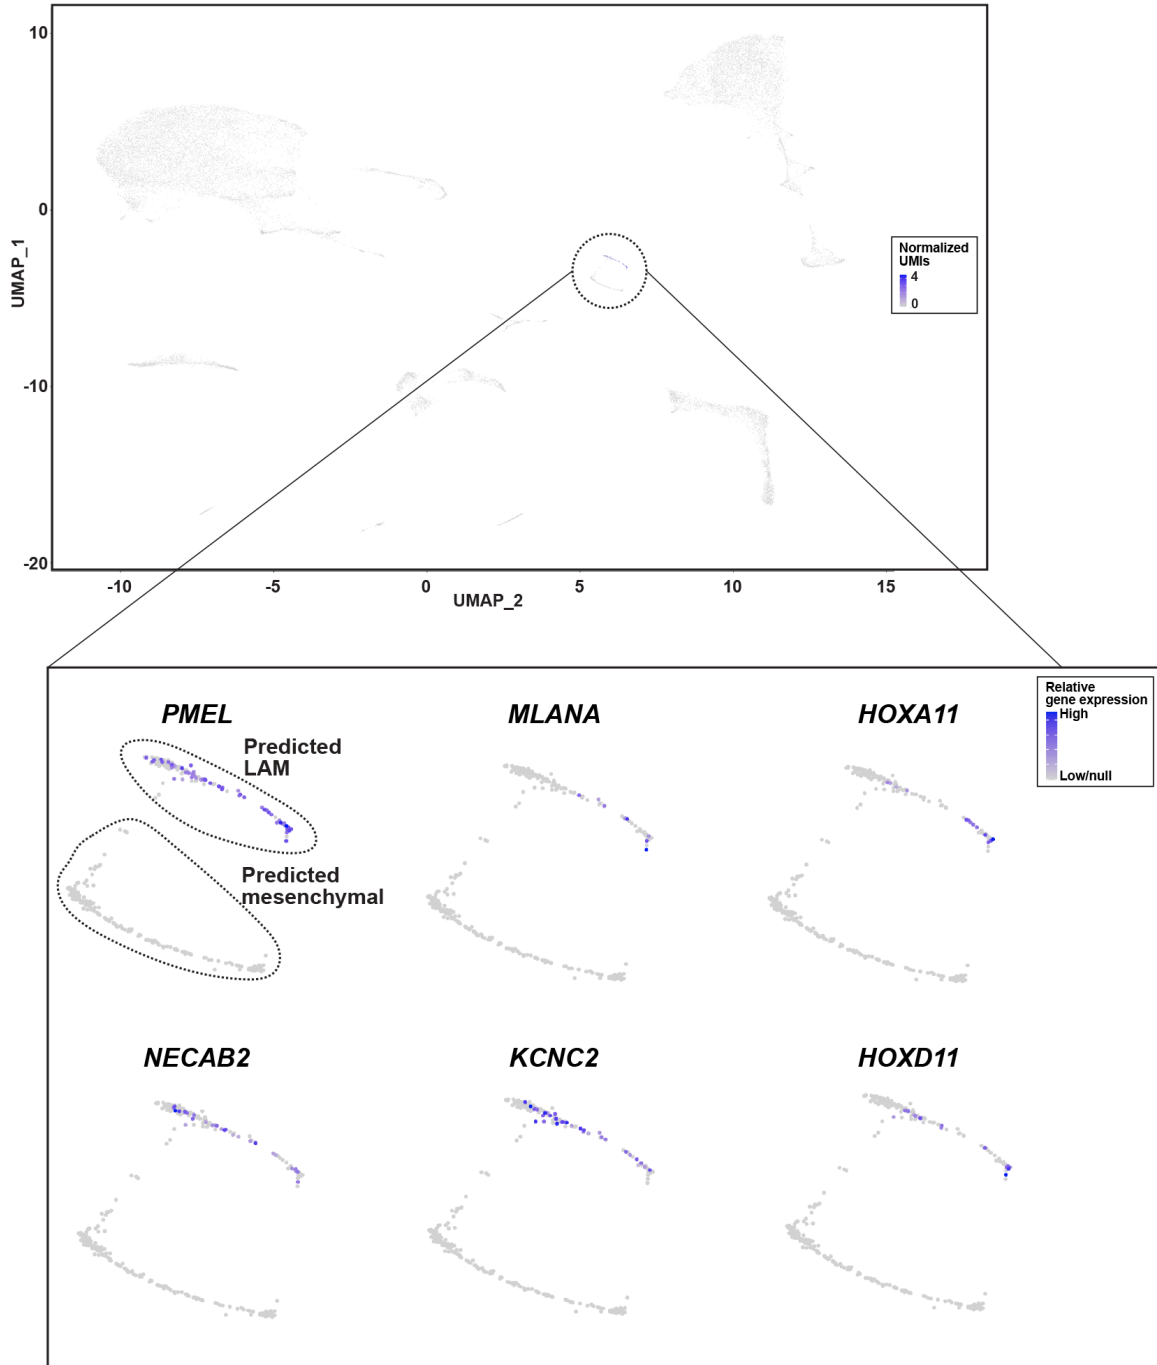

**Figure S2.** Positive controls of immunohistochemical assays. IRF1, cytoplasmic expression in breast cancer cells and nuclear expression in immune cells; LCN2, cytoplasmic expression in astrocytes of a brain of a patient diagnosed with cerebrospinal fluid leak; LUM, cytoplasmic expression in metastatic breast cancer cells in liver; RUNX1, nuclear expression in endometrial cancer cells; and YB1 nuclear and cytoplasmic expression in triple-negative breast cancer.

**Figure S2**

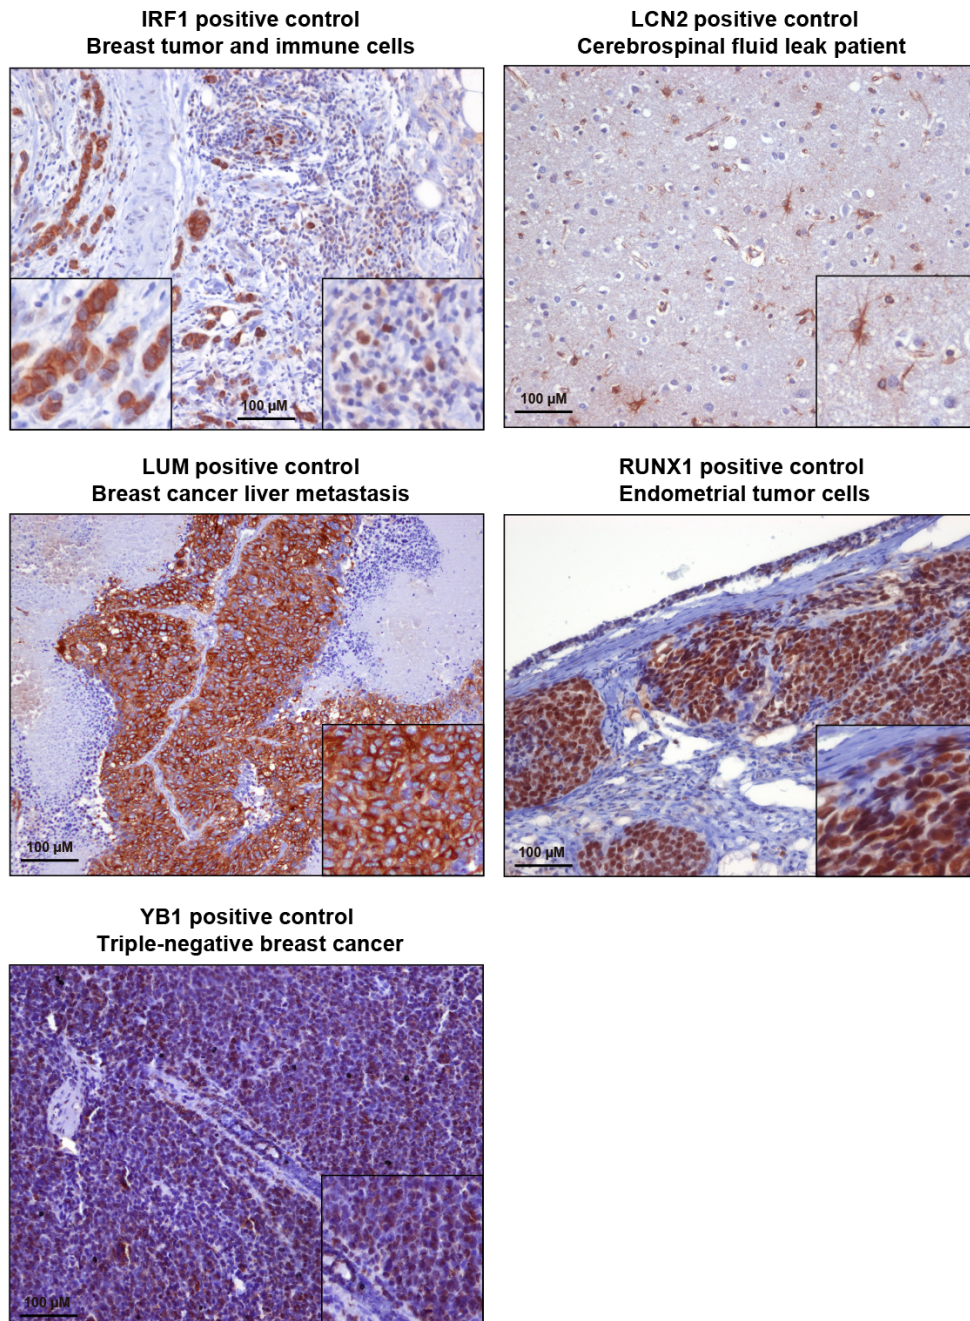

**Figure S3.** Unsupervised hierarchical clustering of expression differences (fold change) of LAMP<sup>P</sup> genes between LAM lung nodules and melanoma (Malme-3M) or pulmonary arterial smooth muscle (PASM) cells. Data from the GEO GSE12027 study (28). The genes marked in red were found to be significantly (Kruskal–Wallis test  $P < 0.05$ ) overexpressed in LAM lung nodules relative to both cell lines.

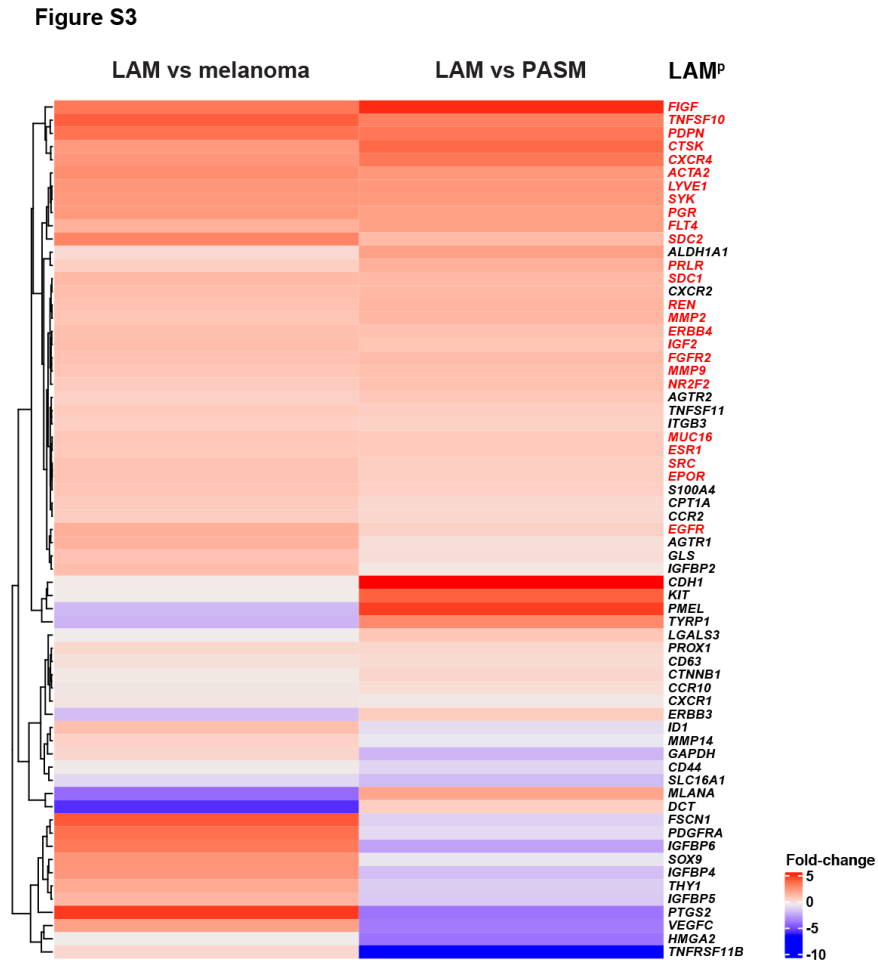

**Figure S4.** LAM<sup>core</sup> correlation with ER-target and PR/ER-target signatures in LAM cells with low (left panel) and high (right panel) LAM<sup>core</sup> scores. The  $r_s$  are indicated; n.s., not significant.

**Figure S4**

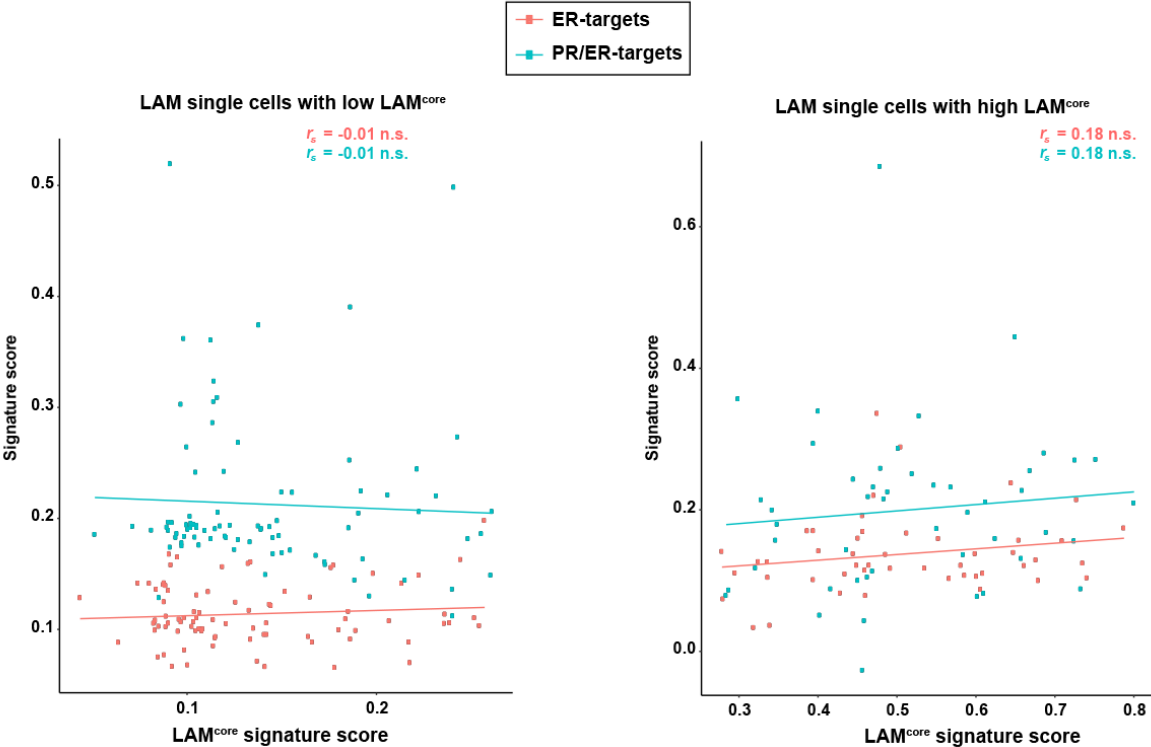

**Figure S5. A**,  $LAMP^p$ - $LAMP^{core}$  score correlations ( $r_s$  and  $P$  value are indicated) in normal-adjacent (left panel) and primary tissue (right panel) of 15 TCGA cancer studies (inset). The number of samples included in each analysis is indicated. **B**, Unsupervised hierarchical clustering of  $LAMP^{core}$  (top panels) and  $LAMP^p$  (bottom panels) genes in normal-adjacent (left panels) primary tumor (right panels) tissue of 15 TCGA cancer studies. The normal/tissue types most frequently corresponding to high signature scores are indicated at the bottom of each panel.

**Figure S5**

**A**

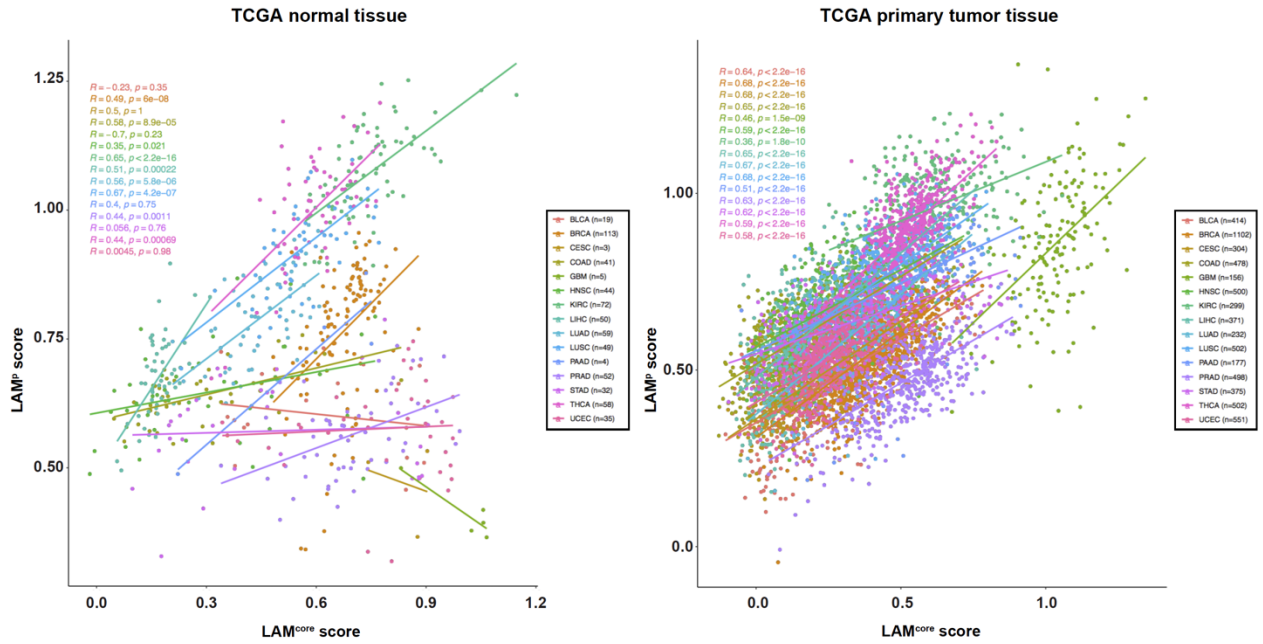

B

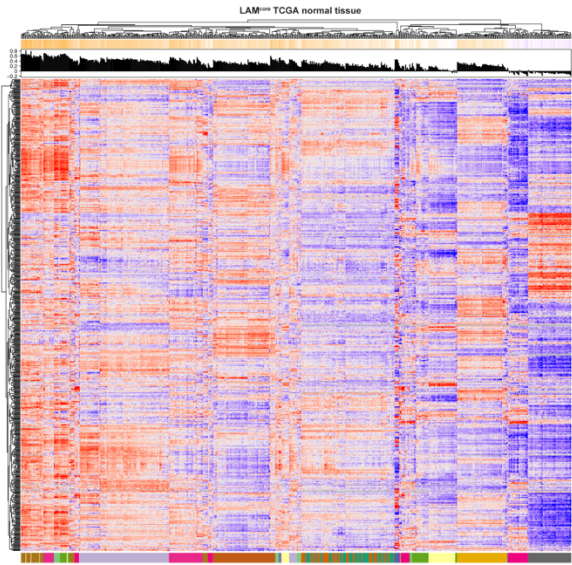

BLCA  
HNSC  
KIRC  
STAD

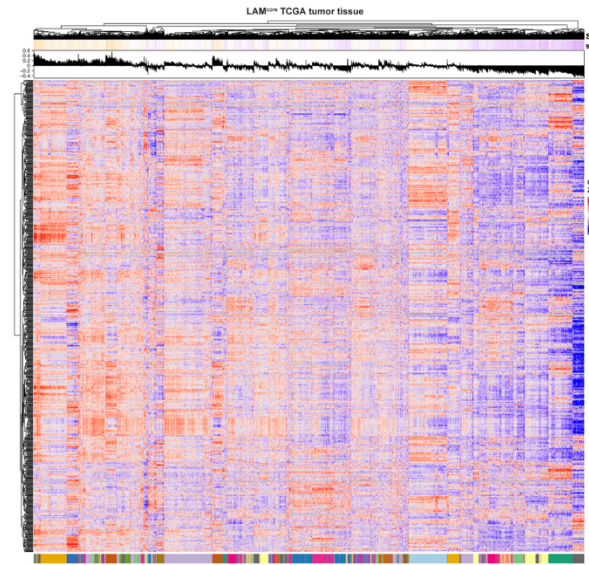

BLCA  
KIRC  
STAD

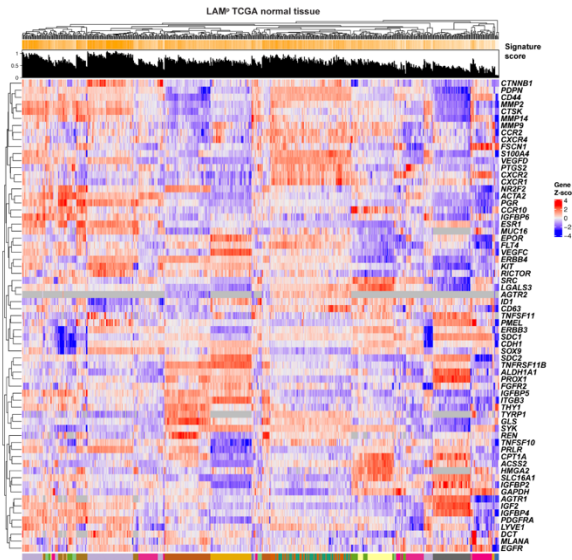

BRCA

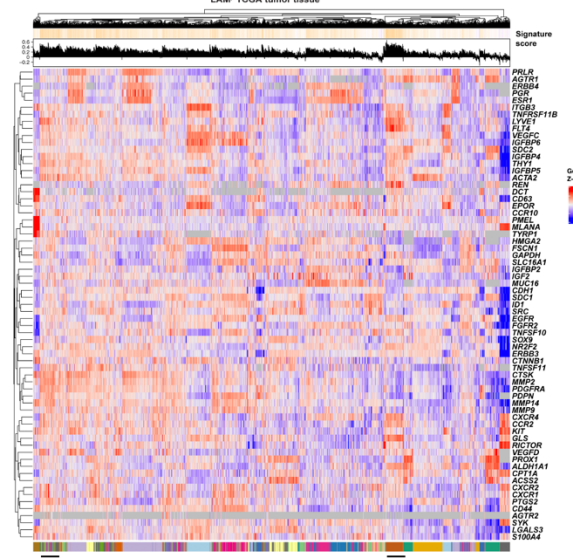

BLCA  
HNSC  
PAAD  
STAD

KIRC

**Figure S6.** Graphs showing the *IRF1* (left) and *RUNX1* (right) loci (genome hg19, other genes in these regions are not depicted) association results ( $-\log_{10}$  P value, Y-axis) with spirometry measures (FEV<sub>1</sub>, FVC, FEV<sub>1</sub>/FVC, and PEF). The data corresponds to the summary statistics of the genome-wide association study of the UK Biobank and SpiroMeta consortium.

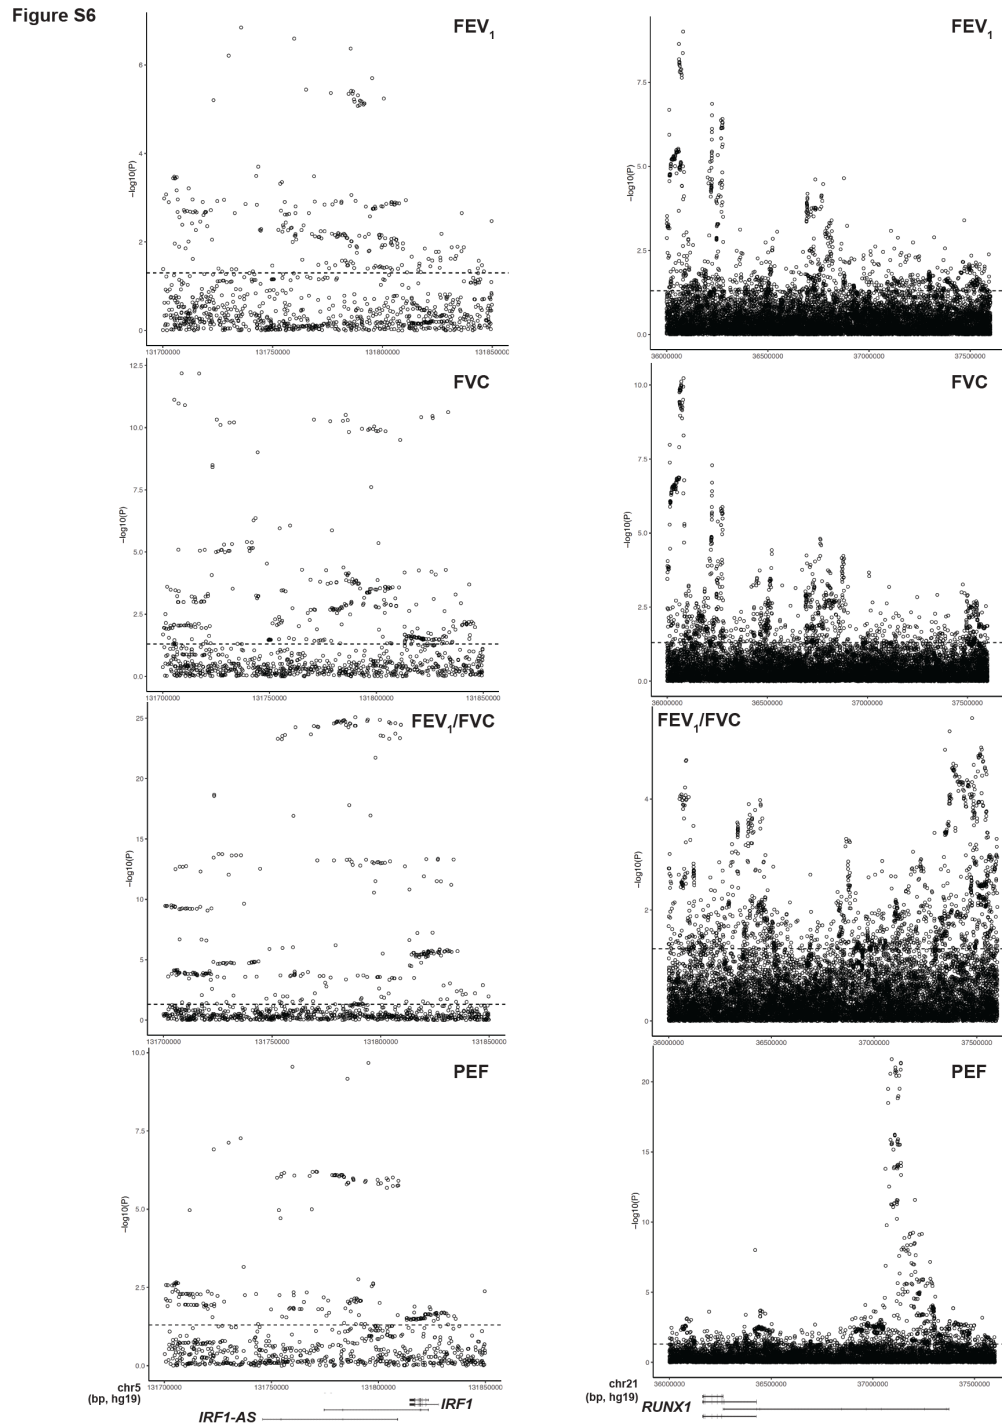

Supplement: NIHMS1729426-supplement-1.pdf [file NIHMS1729426-supplement-1.pdf]
